# Supplementary material for: Pediatric tele-coaching fidelity evaluation: Feasibility, perceived satisfaction and usefulness of a new measure
Source: PubMed Central journal article supplement (PMC9989194; doi:10.3389/fresc.2023.1057641), 2023-02-21
Supplement: Image1.pdf [file Image1.pdf]

Supplementary Material 1 Overview of the *BRIGHT Coaching* program

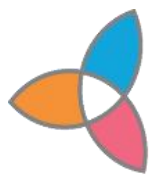

# BRIGHT Coaching

TALK - LEARN - SHARE

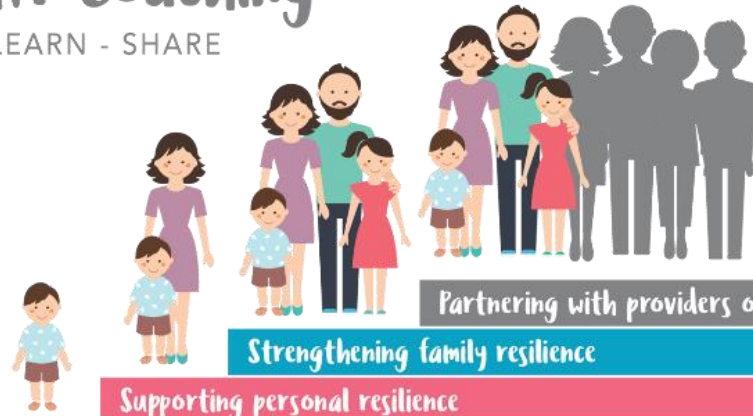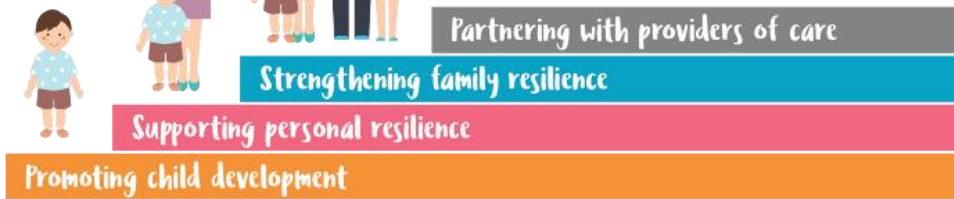

|                                                       |
|-------------------------------------------------------|
| <b>Welcome to BRIGHT Coaching</b>                     |
| Topic 1: Telling your story                           |
| Topic 2: Understanding child development              |
| Topic 3: Supporting child development                 |
| Topic 4: Finding your support people                  |
| Topic 5: Understanding the roles of service providers |
| Topic 6: Understanding diagnosis                      |
| Topic 7: Nurturing child development every day        |
| Topic 8: Preparing for appointments                   |
| Topic 9: Staying organized                            |
| Topic 10: Experiencing your child                     |
| Topic 11: Experiencing your family                    |
| Topic 12: From surviving to thriving                  |
| <b>Wrap-up</b>                                        |

**TALK**  
TO A COACH  
THROUGH  
THIS TRANSITION

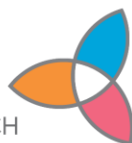

**LEARN**

HOW YOU  
CAN SUPPORT  
YOUR CHILD

**SHARE**

AND CONNECT  
WITH OTHER  
PARENTS
