# Supplementary material for: Pediatric tele-coaching fidelity evaluation: Feasibility, perceived satisfaction and usefulness of a new measure
Source: PubMed Central journal article supplement (PMC9989194; doi:10.3389/fresc.2023.1057641), 2023-02-21
Supplement: Image2.pdf [file Image2.pdf]

## Supplementary Material 2 Development process of the CO-FIDEL

### DEVELOPMENT OF CO-FIDEL

(1) Literature review of the intervention studies related to coaching fidelity ascertainment procedures

(2) An opinion-seeking technique from experts in the field of coaching and childhood disability

CO-FIDEL's development was aligned with the *Comprehensive Intervention Fidelity Guide (Component 3-Monitoring Intervention Delivery)* (Gearing et al., 2011)

### DEVELOPMENT PROCEDURE

1) **BRIGHT Coaching** published a **systematic review and analysis** on existing coaching interventions provided to parents of children with disability (Ogourtsova et al., 2019). Included **28 intervention studies**, extracting information on coaches training and fidelity ascertainment.

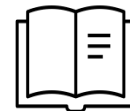

2) Four (n=4) **experts** in the field of family coaching and childhood disability participated

Review results presented to the participating experts

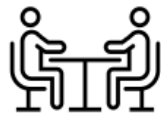

Discussion on an optimal coaching fidelity evaluation tool: **Content, nature, administration method, frequency of administration, and scoring**

### PROPOSED DESIGN OF CO-FIDEL:

**Expert discussion** determined measurement elements reflective of:  
BRIGHT Coaching program (Majnemer, O'Donnell, Ogourtsova et al., 2021)  
Overall childhood disability coaching principles  
Fidelity measurement.

1) **Types of behaviors to be measured:** Behaviors that are program-specific, essential, and behaviors that need to be avoided (Waltz et al, 1993).

2) **Coaching competence:** The level of engagement with participant (Santacroce et al., 2004), and the sensitivity with which the treatment protocol was applied (Perepletchikova et al., 2007).

3) **Measures:** Frequency counts of particular behaviors (Waltz et al, 1993) and use of a rating scale to better reflect rater's true evaluation (Preston et al., 2000).

## CO-FIDEL DEVELOPMENT RESULTS

Only **6 out of the 28** included studies in the systemic review referred to the ascertainment of coaches' fidelity in delivering their health coaching program to parents of children with developmental disabilities.

*Systemic review and team discussion among experts in the fields of coaching and childhood disability found:*

1. The fidelity assessment procedure was not discussed in enough detail.
2. The method of fidelity assessment was either a review of an audiotaped or a videotaped session or supervision of active cases by the principal investigator or an accredited practitioner.
3. Evaluation frequency ranged from weekly to bi-monthly.
4. Only one study specified that coaches needed to attain a fidelity score of >90% to begin the provision of the intervention to study participants.

*\*Following the review of findings and team expert discussion*

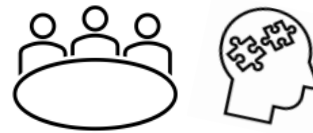

Incorporated principles of the Interview Skills Code (MISC) (Miller et al., 2003; Miller & Rose, 2009) and the Solution-Focused Interview Skills (SFIS) (Bannink, 2010; Cheng, 2007) into the fidelity rating tool

Consistent **MISC** responses included: Advise with permission, affirm, emphasize control, question openly, reflect, reframe, and support.

Non-consistent **MISC** responses included: Advise without permission, confront, direct, raise concern without permission and warn (Miller et al., 2003; Miller & Rose, 2009).

**SFIS** responses include: Open-ended questions, summaries, tolerating and using silences, complimenting participants' strengths and past/current successes, and affirming client's perception (Bannink, 2010; Cheng, 2007)

The two concepts of **MISC and SFIS** influenced the development of the 4 ratable sections of **CO-FIDEL**.

**Version 1.0** of the CO-FIDEL was created.
