# Supplementary material for: Pediatric tele-coaching fidelity evaluation: Feasibility, perceived satisfaction and usefulness of a new measure
Source: PubMed Central journal article supplement (PMC9989194; doi:10.3389/fresc.2023.1057641), 2023-02-21
Supplement: Image3.pdf [file Image3.pdf]

### Supplementary Material 3

**Table 1** Training and assessment of coaches in health coaching programs for parents of children with developmental disabilities

| Reference                 | Coaches characteristics                                                                                                                                              | Coaches training                                                                                                                                                                                                                                                                                                                                             | Coaches fidelity evaluation                                                                                                                                                                                                                                                             |
|---------------------------|----------------------------------------------------------------------------------------------------------------------------------------------------------------------|--------------------------------------------------------------------------------------------------------------------------------------------------------------------------------------------------------------------------------------------------------------------------------------------------------------------------------------------------------------|-----------------------------------------------------------------------------------------------------------------------------------------------------------------------------------------------------------------------------------------------------------------------------------------|
| Feinberg et al., 2014 (1) | Educators representing range of disciplines within early intervention programs (child development, nursing, speech and language, social work) and graduate students. | <p>1 day of didactics + 3 to 5 practice sessions conducted under the supervision of the investigators;</p> <p>Training sessions were videotaped, and all educators received individualized feedback until they have meet predefined criteria for protocol adherence;</p> <p>Educators meet 2 times/week at each site for supervision with investigators.</p> | <p><b>Content:</b> NA</p> <p><b>Method:</b> audiotaped one randomly selected training/coaching sessions from each educator and employed a standardized form to assess whether all components of intervention were present and delivered as per protocol</p> <p><b>Frequency:</b> NA</p> |
| Kasari et al., 2015 (2)   | Therapists were PhD candidates in Psychology.                                                                                                                        | <p>Prior to the beginning of the coaching, therapists were required to demonstrate &gt;90% fidelity on standardized measures designed for the intervention.</p> <p>Training was delivered to them over 2-6 months (no other specifics given)</p>                                                                                                             | <p><b>Content:</b> NA</p> <p><b>Method:</b> Project coordinator used a random numbers list to select sessions for fidelity ratings.</p> <p><b>Frequency:</b> Supervision of active cases was conducted weekly.</p>                                                                      |
| Magana et al., 2017 (3)   | “Promotoras” – mothers of children with ASD, Spanish speaking/Latin American.                                                                                        | 48-hour training: manual content and materials were presented, discussed and role played and research training according to the ethics review board.                                                                                                                                                                                                         | <p><b>Content:</b> NA</p> <p><b>Method:</b> Monitor and feedback by a project coordinator;</p>                                                                                                                                                                                          |

|                              |                                                                                                                            |                                                                                                                                              |                                                                                                                                                                                                                                                                                                                                  |
|------------------------------|----------------------------------------------------------------------------------------------------------------------------|----------------------------------------------------------------------------------------------------------------------------------------------|----------------------------------------------------------------------------------------------------------------------------------------------------------------------------------------------------------------------------------------------------------------------------------------------------------------------------------|
|                              |                                                                                                                            |                                                                                                                                              | <b>Frequency:</b> between each sessions and weekly telephone calls.                                                                                                                                                                                                                                                              |
| Nguyen et al., 2016 (4)      | Therapists with post-graduate levels of education                                                                          | Training workshop; no other details provided.                                                                                                | <b>Content:</b> NA<br><b>Method:</b> review of cases in a group setting with the PI;<br><b>Frequency:</b> weekly for 2 hours.                                                                                                                                                                                                    |
| Whittingham et al., 2009 (5) | Probationary psychologists                                                                                                 | 2-day training workshop                                                                                                                      | <b>Content:</b> NA<br><b>Method:</b> supervision sessions with an accredited practitioner;<br><b>Frequency:</b> weekly.                                                                                                                                                                                                          |
| Stahmer et al., 2017 (6)     | Individuals with degree in their primary discipline (behavior specialist, SLP, special educators, family/child counselors) | 2-day training workshop (16 hours total): didactic presentations, video examples, role-playing activities, small and large group discussions | <b>Content:</b> checklist, comments;<br><b>Method:</b> performance feedback via video or live observation regarding the implementation. All therapists received feedback (regardless of their performance). Occurred either in-person or via technology connection (skype, videoconference, etc.)<br><b>Frequency:</b> Bimonthly |

*Legend:* Autism spectrum disorder (ASD); principal investigator (PI); not available (NA).

1. Feinberg E, Augustyn M, Fitzgerald E, Sandler J, Ferreira-Cesar Suarez Z, Chen N, et al. Improving maternal mental health after a child's diagnosis of autism spectrum disorder: results from a randomized clinical trial. *JAMA Pediatr.* 2014;168(1):40-6.

2. Kasari C, Gulsrud A, Paparella T, Hellemann G, Berry K. Randomized comparative efficacy study of parent-mediated interventions for toddlers with autism. *J Consult Clin Psychol*. 2015;83(3):554-63.
3. Magana S, Lopez K, Machalicek W. Parents Taking Action: A Psycho-Educational Intervention for Latino Parents of Children With Autism Spectrum Disorder. *Fam Process*. 2017;56(1):59-74.
4. Nguyen CT, Fairclough DL, Noll RB. Problem-solving skills training for mothers of children recently diagnosed with autism spectrum disorder: A pilot feasibility study. *Autism*. 2016;20(1):55-64.
5. Whittingham K, Sofronoff K, Sheffield J, Sanders MR. Stepping Stones Triple P: an RCT of a parenting program with parents of a child diagnosed with an autism spectrum disorder. *J Abnorm Child Psychol*. 2009;37(4):469-80.
6. Stahmer AC, Brookman-Frazee L, Rieth SR, Stoner JT, Feder JD, Searcy K, et al. Parent perceptions of an adapted evidence-based practice for toddlers with autism in a community setting. *Autism*. 2017;21(2):217-30.
