# Supplementary material for: Pediatric tele-coaching fidelity evaluation: Feasibility, perceived satisfaction and usefulness of a new measure
Source: PubMed Central journal article supplement (PMC9989194; doi:10.3389/fresc.2023.1057641), 2023-02-21
Supplement: Image4.pdf [file Image4.pdf]

**Supplementary Material 4 CO-FIDEL Version 1.0**

**CO-FIDEL - COaches Fidelity in Intervention DELivery**

Partly adopted from the Motivational Interviewing Skill Code 2.1 (MISC) and the Solution Focused Interviewing Skills (SFIS) & Questions

**DESCRIPTORS:**

|                                         |                                                                                                                                                                                                                  |
|-----------------------------------------|------------------------------------------------------------------------------------------------------------------------------------------------------------------------------------------------------------------|
| <b>Coach:</b>                           |                                                                                                                                                                                                                  |
| <b>Topic:</b>                           |                                                                                                                                                                                                                  |
| <b>Session #:</b>                       |                                                                                                                                                                                                                  |
| <b>Date of session:</b>                 |                                                                                                                                                                                                                  |
| <b>Evaluation #:</b>                    |                                                                                                                                                                                                                  |
| <b>Participants on call:</b>            | <b>Mother</b> <input type="checkbox"/> <b>Father</b> <input type="checkbox"/> <b>Grandparent</b> <input type="checkbox"/> <b>Foster parent</b> <input type="checkbox"/><br><b>Other</b> <input type="checkbox"/> |
| <b>Evaluation form completed by:</b>    |                                                                                                                                                                                                                  |
| <b>Evaluation form completed on:</b>    |                                                                                                                                                                                                                  |
| <b>Timeframe used to complete MISC:</b> |                                                                                                                                                                                                                  |

**GENERAL COMMENTS:**

**OVERVIEW: COACH DELIVERY / CONTENT / APPROACH** (out of 70)

| <b>The extent to which the coach ...</b>                                                  | <b>1-<br/>LOW</b>        | <b>2</b>                 | <b>3</b>                 | <b>4</b>                 | <b>5</b>                 | <b>6</b>                 | <b>7-<br/>HIGH</b>       |
|-------------------------------------------------------------------------------------------|--------------------------|--------------------------|--------------------------|--------------------------|--------------------------|--------------------------|--------------------------|
| 1. is able to guide the participants through the content of the session                   | <input type="checkbox"/> | <input type="checkbox"/> | <input type="checkbox"/> | <input type="checkbox"/> | <input type="checkbox"/> | <input type="checkbox"/> | <input type="checkbox"/> |
| 2. covers all the content for the session                                                 | <input type="checkbox"/> | <input type="checkbox"/> | <input type="checkbox"/> | <input type="checkbox"/> | <input type="checkbox"/> | <input type="checkbox"/> | <input type="checkbox"/> |
| 3. is knowledgeable about the activities and encourages the participants to complete them | <input type="checkbox"/> | <input type="checkbox"/> | <input type="checkbox"/> | <input type="checkbox"/> | <input type="checkbox"/> | <input type="checkbox"/> | <input type="checkbox"/> |
| 4. respects/follows the content                                                           | <input type="checkbox"/> | <input type="checkbox"/> | <input type="checkbox"/> | <input type="checkbox"/> | <input type="checkbox"/> | <input type="checkbox"/> | <input type="checkbox"/> |
| 5. respects the pace of the participant                                                   | <input type="checkbox"/> | <input type="checkbox"/> | <input type="checkbox"/> | <input type="checkbox"/> | <input type="checkbox"/> | <input type="checkbox"/> | <input type="checkbox"/> |
| 6. ensures the participant understands the content                                        | <input type="checkbox"/> | <input type="checkbox"/> | <input type="checkbox"/> | <input type="checkbox"/> | <input type="checkbox"/> | <input type="checkbox"/> | <input type="checkbox"/> |
| 7. is interested / curious during the session                                             | <input type="checkbox"/> | <input type="checkbox"/> | <input type="checkbox"/> | <input type="checkbox"/> | <input type="checkbox"/> | <input type="checkbox"/> | <input type="checkbox"/> |
| 8. respects the timeline of the session                                                   | <input type="checkbox"/> | <input type="checkbox"/> | <input type="checkbox"/> | <input type="checkbox"/> | <input type="checkbox"/> | <input type="checkbox"/> | <input type="checkbox"/> |
| 9. respects the boundaries with the participant                                           | <input type="checkbox"/> | <input type="checkbox"/> | <input type="checkbox"/> | <input type="checkbox"/> | <input type="checkbox"/> | <input type="checkbox"/> | <input type="checkbox"/> |
| 10. is able to balance “spontaneous” counseling vs. coaching manual content delivery      | <input type="checkbox"/> | <input type="checkbox"/> | <input type="checkbox"/> | <input type="checkbox"/> | <input type="checkbox"/> | <input type="checkbox"/> | <input type="checkbox"/> |

**GLOBAL COACH RATINGS – MISC (out of 35)**

\*\* Definitions and terms provided in the Manual for the Motivational Interviewing Skill Code (MISC) Version 2.1 by Miller, W.R., Moyers, T.B., Ernst, D., & Amrhein, P., (2008): Center on Alcoholism, Substance Abuse and Addictions, The University of New Mexico; available online at <https://casaa.unm.edu/download/misc.pdf>

|                                                                                                                                                                                                             |                          |                          |                          |                          |                          |                                                                                                                                                                                                                    |            |                          |
|-------------------------------------------------------------------------------------------------------------------------------------------------------------------------------------------------------------|--------------------------|--------------------------|--------------------------|--------------------------|--------------------------|--------------------------------------------------------------------------------------------------------------------------------------------------------------------------------------------------------------------|------------|--------------------------|
| <b>ACCEPTANCE:</b> The extent to which the coach communicates unconditional positive regard to the client:                                                                                                  |                          |                          |                          |                          |                          |                                                                                                                                                                                                                    |            |                          |
| <b>1-LOW</b><br>judgemental, harsh, disrespectful, labelling,<br>condescending**                                                                                                                            | <b>2</b>                 | <b>3</b>                 | <b>4</b>                 | <b>5</b>                 | <b>6</b>                 | <b>7-HIGH</b><br>communicates<br>with acceptance, and respect, is being warm and supportive                                                                                                                        | <b>N/A</b> |                          |
| <input type="checkbox"/>                                                                                                                                                                                    | <input type="checkbox"/> | <input type="checkbox"/> | <input type="checkbox"/> | <input type="checkbox"/> | <input type="checkbox"/> | <input type="checkbox"/>                                                                                                                                                                                           |            | <input type="checkbox"/> |
| <b>EMPATHY:</b> The extent to which the coach understands and/or makes an effort to accurately understand the client’s perspective:                                                                         |                          |                          |                          |                          |                          |                                                                                                                                                                                                                    |            |                          |
| <b>1-LOW</b><br>shows little interest in the client’s own perspective<br>and experiences, little effort to gain a deeper<br>understanding, lacking reflective listening **                                  | <b>2</b>                 | <b>3</b>                 | <b>4</b>                 | <b>5</b>                 | <b>6</b>                 | <b>7-HIGH</b><br>show active interest in making sure they understand the<br>client, include client’s perceptions, situations, meanings,<br>and feelings; accurately follows client’s statements to gain<br>clarity | <b>N/A</b> |                          |
| <input type="checkbox"/>                                                                                                                                                                                    | <input type="checkbox"/> | <input type="checkbox"/> | <input type="checkbox"/> | <input type="checkbox"/> | <input type="checkbox"/> | <input type="checkbox"/>                                                                                                                                                                                           |            | <input type="checkbox"/> |
| <b>SPIRIT:</b> The extent to which the coach uses motivational interviewing skills of collaboration, evocation and autonomy-supportive:                                                                     |                          |                          |                          |                          |                          |                                                                                                                                                                                                                    |            |                          |
| <b>Collaboration:</b> coach negotiates with the client and avoids an authoritarian stance; shows respect for ideas, accepts differences and client’s points of views.                                       |                          |                          |                          |                          |                          |                                                                                                                                                                                                                    |            |                          |
| <b>1-LOW</b>                                                                                                                                                                                                | <b>2</b>                 | <b>3</b>                 | <b>4</b>                 | <b>5</b>                 | <b>6</b>                 | <b>7-HIGH</b>                                                                                                                                                                                                      | <b>N/A</b> |                          |
| <input type="checkbox"/>                                                                                                                                                                                    | <input type="checkbox"/> | <input type="checkbox"/> | <input type="checkbox"/> | <input type="checkbox"/> | <input type="checkbox"/> | <input type="checkbox"/>                                                                                                                                                                                           |            | <input type="checkbox"/> |
| <b>Evocation:</b> coach draws out the client’s perspective rather than installing the coaches’ knowledge, insight and advice; does not educate or give opinions without permission, is curious and patient. |                          |                          |                          |                          |                          |                                                                                                                                                                                                                    |            |                          |
| <b>1-LOW</b>                                                                                                                                                                                                | <b>2</b>                 | <b>3</b>                 | <b>4</b>                 | <b>5</b>                 | <b>6</b>                 | <b>7-HIGH</b>                                                                                                                                                                                                      | <b>N/A</b> |                          |
| <input type="checkbox"/>                                                                                                                                                                                    | <input type="checkbox"/> | <input type="checkbox"/> | <input type="checkbox"/> | <input type="checkbox"/> | <input type="checkbox"/> | <input type="checkbox"/>                                                                                                                                                                                           |            | <input type="checkbox"/> |
| <b>Autonomy-supportive:</b> coach emphasizes the client’s freedom of choice and conveys an understanding that the critical variables for change are within the client and cannot be imposed by others.      |                          |                          |                          |                          |                          |                                                                                                                                                                                                                    |            |                          |
| <b>1-LOW</b>                                                                                                                                                                                                | <b>2</b>                 | <b>3</b>                 | <b>4</b>                 | <b>5</b>                 | <b>6</b>                 | <b>7-HIGH</b>                                                                                                                                                                                                      | <b>N/A</b> |                          |
| <input type="checkbox"/>                                                                                                                                                                                    | <input type="checkbox"/> | <input type="checkbox"/> | <input type="checkbox"/> | <input type="checkbox"/> | <input type="checkbox"/> | <input type="checkbox"/>                                                                                                                                                                                           |            | <input type="checkbox"/> |

**BEHAVIOR COUNTS - MISC**
