# Supplementary material for: Pediatric tele-coaching fidelity evaluation: Feasibility, perceived satisfaction and usefulness of a new measure
Source: PubMed Central journal article supplement (PMC9989194; doi:10.3389/fresc.2023.1057641), 2023-02-21
Supplement: Image5.pdf [file Image5.pdf]

**Supplementary Material 5** CO-FIDEL Version 1.0 detailed description and rating procedure

Each section is scored separately, and the overall fidelity rating is determined as the average  $\pm$  standard deviation (SD) of the 4 obtained scores

| <i>Section</i>                                                              | <i>Method of scoring</i>                                                       | <i>Description</i>                                                                                                                                                                                                                  | <i>Equation</i>                                                                                                                                |
|-----------------------------------------------------------------------------|--------------------------------------------------------------------------------|-------------------------------------------------------------------------------------------------------------------------------------------------------------------------------------------------------------------------------------|------------------------------------------------------------------------------------------------------------------------------------------------|
| <b>1) Overview: Coaching Delivery Content &amp; Attitude</b>                | 10 parts, scored from 1 - “Low” to 7- “High”.                                  | Coach’s ability to guide the participants through the content of each <i>BRIGHT Coaching</i> session, respecting the timeline and the related activities of each session, and the overall attitude of the coach during the session. | $\frac{\sum \text{scores in each of the 10 subsections}}{70} \times 100$                                                                       |
| <b>2) Global Coach Ratings/Motivational Interviewing Skills Code (MISC)</b> | 5 subsections, scored from 1 - “Low” to 7- “High”.                             | Refers to motivational interviewing skills (e.g., acceptance, empathy, collaboration, evocation, and support of autonomy).                                                                                                          | $\frac{\sum \text{scores in each of the 5 subsections}}{35} \times 100$                                                                        |
| <b>3) Behavioral Counts/MISC</b>                                            | Identifying the number of times coach uses consistent vs. inconsistent skills. | Refers to behavioural counts consistent with the motivational interviewing skill code (e.g., affirmation, reflection, reframing, advice with permission) vs. those inconsistent (e.g., confrontation, warning).                     | $\frac{\sum \text{consistent MISC responses during session}}{\sum \text{consistent \& inconsistent MISC responses during session}} \times 100$ |
| <b>4) Global Coach Ratings- Solution Focused Interview Skills</b>           | 7 subsections, scored from 1 - “Low” to 7- “High”.                             | It pertains to the use of solution-focused interview skills (e.g., tolerating silences, complimenting, and amplifying solution talk).                                                                                               | $\frac{\sum \text{scores in each of the 6 of 7 rated subsections}}{42 \text{ or } 49} \times 100$                                              |

Sections 2, 3, and 4 were designed to match the types of behaviors to be measured that are program-specific, essential, and behaviors that need to be avoided (Waltz, Addis, Koerner, & Jacobson, 1993). In addition, as recommended by previous research, we considered including frequency counts of particular behaviors (Waltz et al., 1993) (i.e., Section 3) and the use of a rating scale to better reflect rater’s true evaluation (Preston & Colman, 2000) (i.e., Section 2)
