# Supplementary material for: Pediatric tele-coaching fidelity evaluation: Feasibility, perceived satisfaction and usefulness of a new measure
Source: PubMed Central journal article supplement (PMC9989194; doi:10.3389/fresc.2023.1057641), 2023-02-21
Supplement: Image6.pdf [file Image6.pdf]

## Supplementary Material 6 CO-FIDEL use evaluation

|                                                                                         | Not at all               | Slightly                 | Moderately               | Very much                |
|-----------------------------------------------------------------------------------------|--------------------------|--------------------------|--------------------------|--------------------------|
| <b>Overall, the extent to which are you satisfied with the CO-FIDEL's:</b>              |                          |                          |                          |                          |
| ...content?                                                                             | <input type="checkbox"/> | <input type="checkbox"/> | <input type="checkbox"/> | <input type="checkbox"/> |
| ...format?                                                                              | <input type="checkbox"/> | <input type="checkbox"/> | <input type="checkbox"/> | <input type="checkbox"/> |
| ...administration frequency?                                                            | <input type="checkbox"/> | <input type="checkbox"/> | <input type="checkbox"/> | <input type="checkbox"/> |
| ...understandability?                                                                   | <input type="checkbox"/> | <input type="checkbox"/> | <input type="checkbox"/> | <input type="checkbox"/> |
| ...comprehensiveness (complete/covers all important items)?                             | <input type="checkbox"/> | <input type="checkbox"/> | <input type="checkbox"/> | <input type="checkbox"/> |
| ...relevance to your training needs as a coach?                                         | <input type="checkbox"/> | <input type="checkbox"/> | <input type="checkbox"/> | <input type="checkbox"/> |
| ...usefulness/helpfulness to you as a coach?                                            | <input type="checkbox"/> | <input type="checkbox"/> | <input type="checkbox"/> | <input type="checkbox"/> |
| <b>Overall, the extent to which do you:</b>                                             |                          |                          |                          |                          |
| ...feel assured/positive/motivated when reviewing your CO-FIDEL assessments?            | <input type="checkbox"/> | <input type="checkbox"/> | <input type="checkbox"/> | <input type="checkbox"/> |
| ...feel understood/supported by the lead coach when reviewing your CO-FIDEL assessment? | <input type="checkbox"/> | <input type="checkbox"/> | <input type="checkbox"/> | <input type="checkbox"/> |
| ...feel that you benefit from the use of the CO-FIDEL?                                  | <input type="checkbox"/> | <input type="checkbox"/> | <input type="checkbox"/> | <input type="checkbox"/> |

**Question 1:** What do you most appreciate about the CO-FIDEL and why?

**Question 2:** What do you least appreciate about the CO-FIDEL and why?

**Question 3:** How do you think the CO-FIDEL influenced your coaching skills and the training process?

**Question 4:** What would you like to tell people involved in developing training protocols for coaches involved in programs such as BRIGHT Coaching?

**Question 5:** What else would you like us to know about your experience with CO-FIDEL and/or your training?
